# Supplementary material
Source: Springer Nature journal article supplement (https://www.springermedizin.de/resource/supplementary/12913_2013_3021_MOESM1_ESM.pdf/9532804)
Supplement: MOESM1 [file 9532804]

When you had important questions to ask a doctor, did you get answers that you could understand?

1.  Yes, always
2.  Yes, sometimes
3.  No
4.  I had no need to ask

Do you feel you got enough emotional support from hospital staff during your stay?

1.  Yes, always
2.  Yes, sometimes
3.  No
3.  I did not need any emotional support

Overall, did you feel you were treated with respect and dignity while you were in hospital?

1.  Yes, always
2.  Yes, sometimes
3.  No

Overall, how would you rate the care you received?

1.  Excellent
2.  Very good
3.  Good
4.  Fair
5.  Poor
